# Supplementary material
Source: publisher site journal article supplement (https://www.dovepress.com/get_supplementary_file.php?f=436525.docx)
Supplement: Supplementary file 1 [file get_supplementary_file.php]

**Table S1 – Inclusion & exclusion criteria**

| **Inclusion** | **Exclusion** |
| --- | --- |
| Randomised Controlled Trials | Review articles |
| Observational Cohort studies in which an ICS withdrawal group was compared to an ICS continuation group | Commentary articles |
| Steroid therapy in study includes beclomethasone, fluticasone, mometasone, budesonide, triamcinolone, ciclesonide, and flunisolide | Editorials |
| Inception to present date | Animal studies |
| International studies | Non-English studies |
| English Language | Studies with asthma patient population |
| Outcomes of study include – change in exacerbation frequency, change in lung function, resumption of ICS. | Abstracts from congresses |
|  | Letters |

**Database searches**

**Table S2 Ovid MEDLINE search strategy (R) (1946 to August 1, 2023)**

| 1 | exp chronic obstructive lung disease/ | 65448 |
| --- | --- | --- |
| 2 | copd.mp. | 56932 |
| 3 | coad.mp. | 965 |
| 4 | chronic obstructive airway disease*.mp. | 408 |
| 5 | chronic airflow obstruction*.mp. | 592 |
| 6 | chronic obstructive lung disease.mp. | 4549 |
| 7 | chronic obstructive pulmonary disease*.mp. | 60257 |
| 8 | exp obstructive lung disease/ | 233344 |
| 9 | chronic obstructive bronchopulmonary disease.mp. | 44 |
| 10 | chronic airway obstruction*.mp. | 360 |
| 11 | chronic obstructive respiratory disease.mp. | 97 |
| 12 | 1 or 2 or 3 or 4 or 5 or 6 or 7 or 8 or 9 or 10 or 11 | 261870 |
| 13 | exp corticosteroid/ | 421029 |
| 14 | ICS.mp. | 10927 |
| 15 | exp glucocorticoid/ | 205570 |
| 16 | glucocorticoid.mp. | 58894 |
| 17 | exp beclometasone/ | 3085 |
| 18 | beclometasone.mp. | 262 |
| 19 | fluticasone.mp. | 5062 |
| 20 | exp fluticasone/ | 3391 |
| 21 | mometasone.mp. | 1333 |
| 22 | exp budesonide/ | 5001 |
| 23 | budesonide.mp. | 7071 |
| 24 | triamcinolone.mp. | 12801 |
| 25 | exp triamcinolone/ | 9956 |
| 26 | exp ciclesonide/ | 0 |
| 27 | ciclesonide.mp. | 465 |
| 28 | flunisolide.mp. | 384 |
| 29 | exp flunisolide/ | 0 |
| 30 | inhaled steroid*.mp. | 2455 |
| 31 | inhaled corticosteroid*.mp. | 11631 |
| 32 | adrenal cortex hormones.mp. | 69819 |
| 33 | 13 or 14 or 15 or 16 or 17 or 18 or 19 or 20 or 21 or 22 or 23 or 24 or 25 or 26 or 27 or 28 or 29 or 30 or 31 or 32 | 462224 |
| 34 | exp drug withdrawal/ | 0 |
| 35 | withdraw*.mp. | 150152 |
| 36 | exp deprescription/ | 929 |
| 37 | de-prescrib*.mp. | 123 |
| 38 | deprescrib*.mp. | 1434 |
| 39 | drug cessation.mp. | 470 |
| 40 | drug discontinu*.mp. | 2681 |
| 41 | 34 or 35 or 36 or 37 or 38 or 39 or 40 | 154488 |
| 42 | 12 and 33 and 41 | 656 |
| 43 | stop*.mp. | 155701 |
| 44 | exp drug elimination/ | 1956 |
| 45 | drug eliminat*.mp. | 1278 |
| 46 | terminat*.mp. | 133628 |
| 47 | 34 or 35 or 36 or 37 or 38 or 39 or 40 or 43 or 44 or 45 or 46 | 434267 |
| 48 | 12 and 33 and 47 | 962 |

*: truncation symbol, used to find plural and singular forms of words, and variant endings

**Table S3 Embase search strategy (1974 to 2023 August 1)**

| 1 | exp chronic obstructive lung disease/ | 165218 |
| --- | --- | --- |
| 2 | copd.mp. | 108107 |
| 3 | coad.mp. | 1146 |
| 4 | chronic obstructive airway disease*.mp. | 641 |
| 5 | chronic airflow obstruction*.mp. | 725 |
| 6 | chronic obstructive lung disease.mp. | 166132 |
| 7 | chronic obstructive pulmonary disease*.mp. | 88778 |
| 8 | exp obstructive lung disease/ | 430439 |
| 9 | chronic obstructive bronchopulmonary disease.mp. | 61 |
| 10 | chronic airway obstruction*.mp. | 477 |
| 11 | chronic obstructive respiratory disease.mp. | 179 |
| 12 | 1 or 2 or 3 or 4 or 5 or 6 or 7 or 8 or 9 or 10 or 11 | 456578 |
| 13 | exp corticosteroid/ | 1066784 |
| 14 | ICS.mp. | 21236 |
| 15 | exp glucocorticoid/ | 818843 |
| 16 | glucocorticoid.mp. | 144009 |
| 17 | exp beclometasone/ | 7818 |
| 18 | beclometasone.mp. | 15192 |
| 19 | fluticasone.mp. | 20858 |
| 20 | exp fluticasone/ | 9190 |
| 21 | mometasone.mp. | 6242 |
| 22 | exp budesonide/ | 23973 |
| 23 | budesonide.mp. | 26799 |
| 24 | triamcinolone.mp. | 33302 |
| 25 | exp triamcinolone/ | 16221 |
| 26 | exp ciclesonide/ | 1920 |
| 27 | ciclesonide.mp. | 1982 |
| 28 | flunisolide.mp. | 2477 |
| 29 | exp flunisolide/ | 2435 |
| 30 | inhaled steroid*.mp. | 3910 |
| 31 | inhaled corticosteroid*.mp. | 19281 |
| 32 | adrenal cortex hormones.mp. | 428 |
| 33 | 13 or 14 or 15 or 16 or 17 or 18 or 19 or 20 or 21 or 22 or 23 or 24 or 25 or 26 or 27 or 28 or 29 or 30 or 31 or 32 | 1105202 |
| 34 | exp drug withdrawal/ | 243016 |
| 35 | withdraw*.mp. | 436593 |
| 36 | exp deprescription/ | 1270 |
| 37 | de-prescrib*.mp. | 250 |
| 38 | deprescrib*.mp. | 2286 |
| 39 | drug cessation.mp. | 834 |
| 40 | drug discontinu*.mp. | 5390 |
| 41 | 34 or 35 or 36 or 37 or 38 or 39 or 40 | 441768 |
| 42 | 12 and 33 and 41 | 4478 |
| 43 | stop*.mp. | 245031 |
| 44 | exp drug elimination/ | 47637 |
| 45 | drug eliminat*.mp. | 48321 |
| 46 | terminat*.mp. | 166816 |
| 47 | 34 or 35 or 36 or 37 or 38 or 39 or 40 or 43 or 44 or 45 or 46 | 866330 |
| 48 | 12 and 33 and 47 | 5808 |

*: truncation symbol, used to find plural and singular forms of words, and variant endings

**Table S4 Cochrane CENTRAL (Inception to 1 August 2023)**

| #1 | (ICS):ti,ab,kw (Word variations have been searched) | 7815 |
| --- | --- | --- |
| #2 | inhaled corticosteroid* | 6324 |
| #3 | inhaled steroid* | 2413 |
| #4 | beclometasone | 699 |
| #5 | Fluticasone | 6008 |
| #6 | mometasone | 1514 |
| #7 | Budesonide | 5446 |
| #8 | triamcinolone | 3912 |
| #9 | Ciclesonide | 592 |
| #10 | Flunisolide | 300 |
| #11 | adrenal cortex hormone* | 3434 |
| #12 | #1 OR #2 OR #3 OR #4 OR #5 OR #6 OR #7 OR #8 OR #9 OR #10 OR #11 | 27995 |
| #13 | MeSH descriptor: [Pulmonary Disease, Chronic Obstructive] explode all trees | 7200 |
| #14 | chronic obstructive pulmonary disease | 16684 |
| #15 | Copd | 18929 |
| #16 | Coad | 232 |
| #17 | chronic obstructive airway disease* | 2374 |
| #18 | Cobd | 91 |
| #19 | obstructive lung disease* | 14229 |
| #20 | chronic bronchitis | 2830 |
| #21 | Emphysema | 1901 |
| #22 | #13 OR #14 OR #15 OR #16 OR #17 OR #18 OR #19 OR #20 OR #21 | 28043 |
| #23 | withdraw* | 57597 |
| #24 | deprescrib* | 283 |
| #25 | de-prescrib* | 62 |
| #26 | stop* | 32327 |
| #27 | discontinu* | 46927 |
| #28 | eliminat* | 25149 |
| #29 | terminat* | 15108 |
| #30 | #23 OR #24 OR #25 OR #26 OR #27 OR #28 OR #29 | 148013 |
| #31 | #12 AND #22 AND #30 | 646 |

*: truncation symbol, used to find plural and singular forms of words, and variant endings

**Table S5 CINAHL search (Inception - August 1 2023)**

Top of Form

| S39 | S18 AND S28 AND S38 | 381 |
| --- | --- | --- |
| S38 | S29 OR S30 OR S31 OR S32 OR S33 OR S34 OR S35 OR S36 OR S37 | 161993 |
| S37 | "terminat*" | 22559 |
| S36 | "eliminat*" | 44712 |
| S35 | "discontinu*" | 31881 |
| S34 | "stop*" | 37945 |
| S33 | de-prescrib* | 63 |
| S32 | deprescrib* | 1033 |
| S31 | (MH "Deprescribing") | 260 |
| S30 | withdraw* | 32215 |
| S29 | (MH "Treatment Withdrawal") | 121 |
| S28 | S19 OR S20 OR S21 OR S22 OR S23 OR S24 OR S25 OR S26 OR S27 | 78107 |
| S27 | Coad | 18539 |
| S26 | (MH "Lung Diseases, Obstructive+") | 67060 |
| S25 | (MH "Bronchitis, Chronic") | 433 |
| S24 | (MH "Emphysema+") | 3996 |
| S23 | Emphysema | 22448 |
| S22 | chronic bronchitis | 2067 |
| S21 | chronic obstructive pulmonary disease | 28914 |
| S20 | Copd | 26151 |
| S19 | (MH "Pulmonary Disease, Chronic Obstructive+") | 22705 |
| S18 | S1 OR S2 OR S3 OR S4 OR S5 OR S6 OR S7 OR S8 OR S9 OR S10 OR S11 OR S12 OR S13 OR S14 OR S15 OR S16 OR S17 | 47004 |
| S17 | "flunisolide" | 47 |
| S16 | "ciclesonide" | 104 |
| S15 | Triamcinolone | 2178 |
| S14 | (MH "Triamcinolone") | 1641 |
| S13 | Budesonide | 1588 |
| S12 | (MH "Budesonide") | 1077 |
| S11 | "mometasone" | 266 |
| S10 | Fluticasone | 1308 |
| S9 | (MH "Fluticasone") | 454 |
| S8 | Beclomethasone | 586 |
| S7 | (MH "Beclomethasone") | 431 |
| S6 | inhaled steroid* | 694 |
| S5 | adrenal cortex hormone* | 17269 |
| S4 | Ics | 2193 |
| S3 | "ICS" | 2183 |
| S2 | inhaled corticosteroid* | 3412 |
| S1 | (MH "Adrenal Cortex Hormones+") | 41043 |

*: truncation symbol, used to find plural and singular forms of words, and variant endings

**Table S6 Web of science (1992-2023)**

| 1 | ALL=(copd) | 81617 |
| --- | --- | --- |
| 2 | ALL=("chronic obstructive pulmonary disease*") | 64095 |
| 3 | ALL=(coad) | 3287 |
| 4 | ALL=(cobd) | 40 |
| 5 | ALL=("chronic bronchitis") | 9688 |
| 6 | ALL=(bronchitis) | 22391 |
| 7 | ALL=(emphysema) | 27581 |
| 8 | ALL=("obstructive lung disease*") | 7515 |
| 9 | #1 OR #2 OR #3 OR #4 OR #5 OR #6 OR #7 OR #8 | 147162 |
| 10 | ALL=(ics) | 51531 |
| 11 | ALL=("inhaled corticosteroid*") | 14489 |
| 12 | ALL=("adrenal cortex hormone*") | 401 |
| 13 | ALL=("inhaled steroid*") | 2369 |
| 14 | ALL=(glucocorticoid*) | 99342 |
| 15 | ALL=(beclomethasone) | 4678 |
| 16 | ALL=(fluticasone) | 9272 |
| 17 | ALL=(mometasone) | 1768 |
| 18 | ALL=(budesonide) | 10990 |
| 19 | ALL=(triamcinolone) | 11072 |
| 20 | ALL=(ciclesonide) | 586 |
| 21 | ALL=(flunisolide) | 382 |
| 22 | #10 OR #11 OR #12 OR #13 OR #14 OR #15 OR #16 OR #17 OR #18 OR #19 OR #20 OR #21 | 186778 |
| 23 | ALL=(withdraw*) | 180208 |
| 24 | ALL=(deprescrib*) | 1735 |
| 25 | ALL=(de-prescrib*) | 131 |
| 26 | ALL=(stop* ) | 336629 |
| 27 | ALL=(eliminat*) | 694831 |
| 28 | ALL=(discontinu*) | 276773 |
| 29 | ALL=("drug cessation") | 449 |
| 30 | ALL=(terminat*) | 215104 |
| 31 | #23 OR #24 OR #25 OR #26 OR #27 OR #28 OR #29 OR #30 | 1656151 |
| 32 | #31 AND #22 AND #9 | 509 |

*: truncation symbol, used to find plural and singular forms of words, and variant endings

**Table S7 GRADE assessment of change in exacerbation frequency following ICS withdrawal in RCTs**

| GRADE criteria | Studies (pts)  9 (5565) | Rating | Footnotes | Quality of evidence |
| --- | --- | --- | --- | --- |
| Study design |  | 0 | 8 studies double blind, 1 study open label | moderate |
| Risk of bias |  | 0 | 4 studies had unclear allocation concealment, 1 studies had unclear risk of attrition bias, 5 studies had unclear risk of detection bias |
| Inconsistency |  | 0 | Clinical heterogeneity in type of ICS withdrawn and type of maintenance therapy. Consistency within studies between withdrawal and steroid arms in clinical characteristics including degree of airflow limitation, prior exacerbation frequency |
| Indirectness of patients, intervention and comparator |  | -1 | Clinical heterogeneity in comparator medication within study withdrawal arms (placebo, LABA monotherapy, LABA/LAMA dual therapy). Variation in definition of exacerbations. |
| Imprecision |  | 0 | 3596 cumulative exacerbation events recorded |
| Publication bias |  | 0 | The majority of the studies were RCTs with at least 500 participants |

**Table S8 Newcastle-Ottawa Quality Assessment Scale for Observational Case-Control Studies**

| **Author** | **Is the case definition adequate? a** | **Representativeness of the cases b** | **Selection of Controls c** | **Definition of controls d** | **Comparability of cases and controls on the basis of the design or analysis e** | **Ascertainment of exposure f** | **Same method of ascertainment for cases and controls g** | **Non-response rate h** | **Overall  Score** |
| --- | --- | --- | --- | --- | --- | --- | --- | --- | --- |
| **Vogelmeier 2017** | a)(+1) | a)(+1) | a)(+1) | a)(+1) | a)(+1) b)(+1) | a)(+1) | a)(+1) | b)(+0) | 8 |
| **Rossi 2014** | a)(+1) | a)(+1) | b)(+0) | a)(+1) | a)(+1) | e)(+0) | a)(+1) | b)(+0) | 5 |
| **Magnussen 2021** | a)(+1) | a)(+1) | a)(+1) | a)(+1) | a)(+1) | a)(+1) | a)(+1) | a)(+1) | 8 |
| **Neches Garcia 2022** | a)(+1) | a)(+1) | c)(+0) | a)(+1) | a)(+1) | a)(+1) | a)(+1) | a)(+1) | 7 |
| **Suissa 2022** | a)(+1) | a)(+1) | a)(+1) | a)(+1) | a)(+1) | a)(+1) | a)(+1) | a)(+1) | 8 |
| **Whittaker 2022** | a)(+1) | a)(+1) | a)(+1) | a)(+1) | a)(+1) | a)(+1) | a)(+1) | a)(+1) | 8 |

**a Is the case definition adequate?** a) yes, with independent validation b) yes, eg record linkage or based on self reports c) no description

**b****Representativeness of the cases** a) consecutive or obviously representative series of cases b) potential for selection biases or not stated

**c Selection of Controls** a) community controls b) hospital controls c) no description

**d Definition of Controls** a) no history of disease (endpoint) b) no description of source

**e Comparability of cases and controls on the basis of the design or analysis** a) study controls for age. b) study controls for any additional factor e,g. sex

**f Ascertainment of exposure** a) secure record (eg surgical records) b) structured interview where blind to case/control status c) interview not blinded to case/control status d) written self report or medical record only e) no description

**g Same method of ascertainment for cases and controls** a) yes b) no

**h Non-Response rate** a) same rate for both groups b) non respondents described c) rate different and no designation

**Table S9 GRADE assessment of change in lung function (FEV1) following ICS withdrawal in RCTs**

| GRADE criteria | Studies (pts)  10 (6645) | Rating | Footnotes | Quality of evidence |
| --- | --- | --- | --- | --- |
| Study design |  | 0 | 8 studies double blind, 2 studies open label | Moderate |
| Risk of bias |  | 0 | 5 studies had unclear allocation concealment, 2 studies had unclear risk of attrition bias, 6 studies had unclear risk of detection bias |
| Inconsistency |  | 0 | Clinical heterogeneity in type of ICS withdrawn and type of maintenance therapy. Consistency within studies between withdrawal and steroid arms in clinical characteristics including degree of airflow limitation, prior exacerbation frequency |
| Indirectness of patients, intervention and comparator |  | -1 | Clinical heterogeneity in comparator medication within study withdrawal arms (placebo, LABA monotherapy, LABA/LAMA dual therapy). Variation in definition of exacerbations. |
| Imprecision |  | 0 |  |
| Publication bias |  | 0 | The majority of the studies were RCTs with at least 500 participants |

Figure S1

**Risk ratio exacerbations COPD patients (withdrawal ICS vs. continuation ICS treatment) ≥300cells/µL eosinophils.** ES, effect size

Figure S2

**Change in lung function COPD patients (withdrawal ICS vs. continuation ICS treatment) ≥300cells/µL eosinophils.** ES, effect size

Figure S3

**Risk ratio exacerbations COPD patients (withdrawal ICS vs. continuation ICS treatment) <300cells/µL eosinophils.** ES, effect size

Figure S4

**Change in lung function COPD patients (withdrawal ICS vs. continuation ICS treatment) <300cells/µL eosinophils.** ES, effect size
